# Supplementary material
Source: publisher figshare collection journal article supplement (https://geolsoc.figshare.com/ndownloader/files/5424572)
Supplement: Supplementary file 1 [file 5424572]

Tab. A.6 Summary of SHRIMP U-Pb results for zircon grains micro-drilled from thin sections
								Total					Radiogenic							Age (Ma)
Grain.	U	Th	Th/U	206Pb*	204Pb/	f206	238U/		207Pb/		208Pb/		206Pb/		207Pb/			206Pb/	207corr	207Pb/	204corr	207Pb/	208corr	207Pb/
spot	(ppm)	(ppm)		(ppm)	206Pb	%	206Pb	±	206Pb	±	206Pb	±	238U	±	235U	±	%	238U	±	235U	±	235U	±	206Pb	±
WK188A (S1 fabric)
2a.1	444	184	0.41	21.6	0.000317	0.20	17.66	0.21	0.0552	0.0009	0.140	0.0031	0.057	0.0007	0.408	0.0180	4.4	354.5	4.1	336.1	16.2	348.1	17.6	221.2	90.7
2a.2	1038	39	0.04	47.6	0.000054	0.07	18.74	0.20	0.0537	0.0005	0.014	0.0006	0.053	0.0006	0.391	0.0064	1.6	334.9	3.6	333.6	6.3	334.9	6.4	325.7	27.1
2a.3	1114	31	0.03	51.0	0.000051	0.15	18.76	0.20	0.0543	0.0005	0.011	0.0005	0.053	0.0006	0.394	0.0062	1.6	334.3	3.5	336.9	6.1	337.7	6.2	353.9	24.9
11.1	896	22	0.02	41.4	0.000116	0.08	18.59	0.20	0.0538	0.0006	0.010	0.0006	0.054	0.0006	0.394	0.0066	1.7	337.6	3.6	331.3	7.5	337.3	6.6	290.8	36.3
9.1	951	59	0.06	44.3	0.000028	0.14	18.44	0.20	0.0544	0.0005	0.022	0.0009	0.054	0.0006	0.400	0.0071	1.8	340.0	3.6	344.3	6.5	341.8	7.1	371.1	26.6
9.2	679	73	0.11	32.0	0.000019	0.04	18.21	0.20	0.0537	0.0006	0.039	0.0013	0.055	0.0006	0.393	0.0089	2.3	344.5	3.8	344.6	7.1	336.9	8.8	345.4	29.7
6.1	1046	24	0.02	48.6	0.000141	0.06	18.49	0.20	0.0537	0.0005	0.008	0.0005	0.054	0.0006	0.397	0.0063	1.6	339.3	3.6	330.0	7.4	339.8	6.3	270.3	36.1	in Grt
4.1 (not plotted)	1186	29	0.02	56.9	0.000091	<0.01	17.89	0.19	0.0527	0.0005	0.008	0.0004	0.056	0.0006	0.404	0.0061	1.5	350.9	3.7	338.0	7.6	344.9	6.1	256.6	36.3	in Grt
4.2	1095	133	0.12	50.3	0.000048	0.03	18.70	0.20	0.0534	0.0005	0.043	0.0016	0.053	0.0006	0.380	0.0100	2.6	335.7	3.6	333.2	6.7	327.7	9.8	317.1	29.6	in Grt
10a.1	930	30	0.03	44.9	-	<0.01	17.77	0.19	0.0533	0.0005	0.011	0.0006	0.056	0.0006	0.413	0.0068	1.6	353.0	3.8	352.0	6.3	350.9	6.8	346.1	23.3
WK188B (S1 fabric)
5.1	1119	33	0.03	54.2	0.000145	0.17	17.73	0.19	0.0549	0.0005	0.013	0.0005	0.056	0.0006	0.417	0.0066	1.6	353.2	3.8	348.6	7.5	354.3	6.6	320.8	32.8
5.2	881	21	0.02	41.4	-	<0.01	18.28	0.20	0.0532	0.0006	0.009	0.0009	0.055	0.0006	0.396	0.0069	1.7	343.5	3.7	349.1	7.4	338.8	6.9	384.1	31.7
WK196AB (S2 fabric)
8.1	864	69	0.08	42.2	0.000140	0.10	17.59	0.19	0.0544	0.0006	0.028	0.0011	0.057	0.0006	0.419	0.0084	2.0	356.0	3.9	348.6	8.9	355.7	8.4	303.5	41.8	in Grt
8.2 (not plotted)	108	228	2.11	5.1	-	0.31	18.03	0.30	0.0559	0.0018	0.680	0.0155	0.055	0.0009	0.445	0.1114	25.1	346.8	5.6	450.4	55.7	373.2	105.3	972.9	202.8	in Grt
8.3	177	99	0.56	8.3	-	0.27	18.21	0.26	0.0555	0.0014	0.200	0.0064	0.055	0.0008	0.353	0.0315	8.9	343.7	4.9	361.9	13.2	309.0	30.5	471.6	59.8	in Grt
10.1	1100	102	0.09	51.4	0.000023	<0.01	18.38	0.21	0.0532	0.0006	0.032	0.0011	0.054	0.0006	0.391	0.0080	2.0	341.7	3.8	338.9	6.8	335.1	8.0	321.3	28.7
10.2	127	46	0.36	5.9	0.000290	1.56	18.54	0.31	0.0657	0.0019	0.139	0.0065	0.053	0.0009	0.414	0.0347	8.4	333.6	5.6	380.8	32.6	354.2	33.5	657.5	149.4
11.1	2337	700	0.30	106.4	0.000078	0.10	18.87	0.20	0.0539	0.0004	0.097	0.0013	0.053	0.0006	0.395	0.0098	2.5	332.6	3.4	330.6	5.8	337.7	9.6	317.8	24.2	in Grt
13.1	224	111	0.50	9.7	0.000238	0.44	19.74	0.30	0.0563	0.0023	0.159	0.0060	0.050	0.0008	0.400	0.0300	7.5	317.1	4.8	317.4	28.3	341.2	29.2	320.3	171.4
13.2	85	60	0.70	3.8	0.001472	1.88	19.17	0.39	0.0679	0.0026	0.247	0.0117	0.051	0.0011	0.417	0.0544	13.0	321.7	6.5	284.5	57.2	356.2	52.0	16.7	427.2
13.3	676	94	0.14	29.5	0.000151	0.23	19.71	0.24	0.0546	0.0008	0.046	0.0018	0.051	0.0006	0.380	0.0104	2.7	318.4	3.8	316.5	9.8	327.2	10.3	304.4	53.7
1.1 (not plotted)	234	360	1.54	10.9	0.000579	2.01	18.50	0.26	0.0693	0.0014	0.586	0.0104	0.053	0.0007	0.148	0.0695	47.0	332.7	4.6	376.5	19.5	150.2	66.9	636.5	87.9
1.2	565	376	0.67	26.6	0.000130	<0.01	18.28	0.21	0.0523	0.0014	0.220	0.0038	0.055	0.0007	0.377	0.0240	6.4	343.8	4.0	326.3	14.2	325.0	23.4	212.8	81.7
1.3	196	171	0.87	8.5	0.001283	1.96	19.68	0.27	0.0684	0.0034	0.307	0.0072	0.050	0.0007	0.392	0.0429	11.0	313.4	4.5	296.2	60.7	338.3	41.7	177.9	422.5
12.1	1708	186	0.11	86.0	0.000077	<0.01	17.06	0.20	0.0534	0.0004	0.037	0.0016	0.059	0.0007	0.426	0.0103	2.4	367.4	4.2	357.2	6.7	360.7	10.1	296.6	23.8
12.2	145	36	0.25	6.9	0.000323	0.56	18.11	0.27	0.0579	0.0015	0.103	0.0047	0.055	0.0008	0.361	0.0252	7.0	344.6	5.0	343.3	20.8	315.9	24.5	336.5	111.7
WK177L2 (S2 fabric)
3.1	1171	263	0.22	76.2	0.000074	0.13	13.20	0.14	0.0575	0.0004	0.077	0.0013	0.076	0.0008	0.577	0.0131	2.3	470.1	4.9	470.1	9.2	463.5	13.0	470.5	24.5
3.2	241	69	0.29	11.4	0.001359	2.83	18.13	0.24	0.0759	0.0013	0.142	0.0042	0.054	0.0007	0.408	0.0236	5.8	336.5	4.4	353.3	39.1	352.9	23.2	462.0	206.5
4.1	797	69	0.09	38.2	0.000377	0.75	17.93	0.20	0.0595	0.0006	0.039	0.0011	0.055	0.0006	0.420	0.0089	2.1	347.4	3.8	350.7	10.6	357.2	8.9	372.6	51.5
4.2	1591	58	0.04	67.7	0.000784	1.65	20.19	0.25	0.0657	0.0022	0.046	0.0041	0.049	0.0006	0.349	0.0264	7.6	306.7	3.8	316.1	23.3	307.6	25.7	384.6	139.9
2.1	589	61	0.10	28.3	0.000204	0.47	17.89	0.20	0.0573	0.0007	0.043	0.0016	0.056	0.0006	0.411	0.0101	2.5	349.0	3.8	353.9	10.5	350.8	10.0	384.5	50.1
2.2	176	53	0.30	8.3	0.000285	0.09	18.11	0.25	0.0541	0.0012	0.115	0.0042	0.055	0.0008	0.350	0.0209	6.0	346.3	4.7	325.8	15.6	306.7	20.4	193.7	89.6
6.1	696	95	0.14	38.8	0.000122	0.22	15.42	0.17	0.0566	0.0007	0.050	0.0013	0.065	0.0007	0.481	0.0114	2.4	404.1	4.5	404.1	11.3	399.7	11.3	404.6	44.4	in Grt
WK201 (S3 fabric)
1.1	3588	125	0.03	195.6	0.000170	0.17	15.76	0.17	0.0560	0.0004	0.015	0.0010	0.063	0.0007	0.475	0.0077	1.6	396.0	4.1	389.0	8.1	394.9	7.7	351.7	30.3	core
1.2	4100	1588	0.39	222.0	0.000026	0.04	15.87	0.16	0.0549	0.0002	0.134	0.0008	0.063	0.0007	0.439	0.0124	2.8	393.9	3.9	393.5	5.4	370.9	12.1	391.8	11.1	rim
6a.1 (not plotted)	95	63	0.67	4.5	0.002507	1.27	18.03	0.29	0.0636	0.0018	0.249	0.0092	0.055	0.0009	0.364	0.0449	12.3	343.8	5.5	174.1	68.4	319.2	43.1			rim
6a.2	597	232	0.39	34.6	0.000000	0.12	14.84	0.16	0.0562	0.0009	0.137	0.0022	0.067	0.0008	0.472	0.0219	4.6	419.9	4.6	426.5	10.1	393.9	21.4	459.2	34.7	core
9.1	6317	425	0.07	339.6	0.000031	<0.01	15.98	0.16	0.0540	0.0002	0.018	0.0003	0.063	0.0006	0.478	0.0060	1.3	391.6	3.9	385.3	5.1	396.6	6.1	351.0	9.2	core
9.2	190	31	0.17	10.3	0.000407	0.36	15.89	0.21	0.0574	0.0011	0.056	0.0039	0.063	0.0008	0.489	0.0205	4.2	392.0	5.1	372.2	21.6	404.5	20.0	261.2	107.3	rim
5a.1	999	222	0.22	56.8	0.000141	0.31	15.11	0.31	0.0575	0.0010	0.078	0.0013	0.066	0.0014	0.499	0.0209	4.2	411.9	8.3	415.0	15.4	412.0	20.6	431.3	49.6	rim
5a.2	631	24	0.04	27.7	0.002388	4.17	19.55	0.22	0.0860	0.0009	0.100	0.0030	0.049	0.0006	0.338	0.0190	5.6	308.4	3.5	300.1	28.1	306.0	18.9	251.7	185.4	core
Notes:	1. Uncertainties given at the one s level.
	2. Error in Temora reference zircon calibration was 0.61% for the analytical session.
		( not included in above errors but required when comparing data from different mounts).
	3. f206 % denotes the percentage of 206Pb that is common Pb.
